# Supplementary material
Source: PubMed Central journal article supplement (PMC5557696)

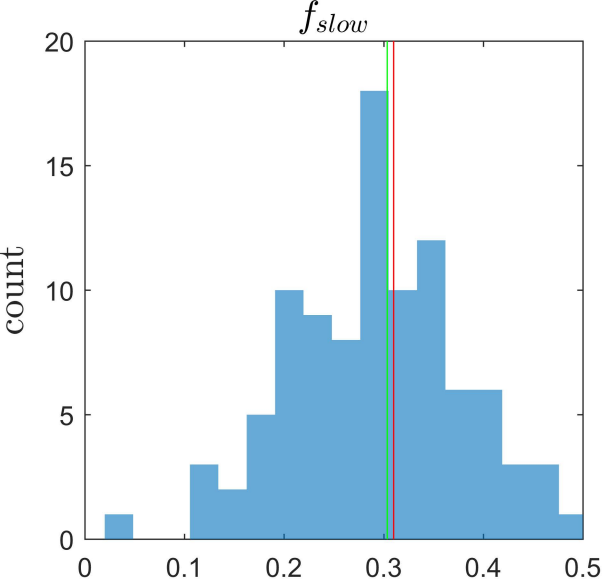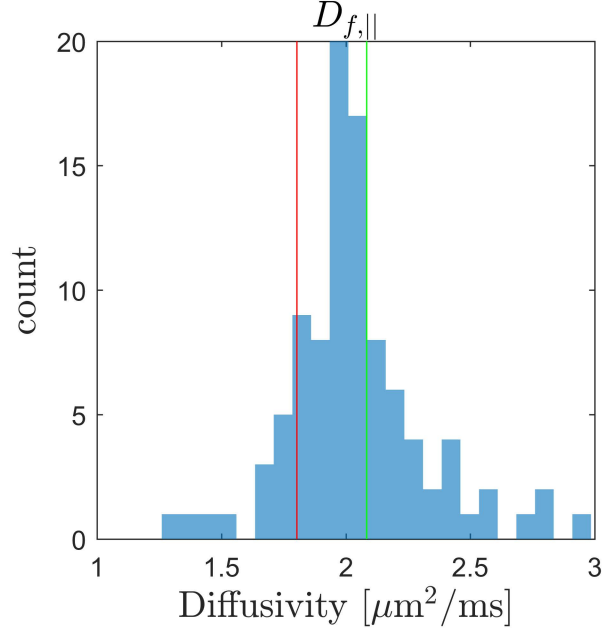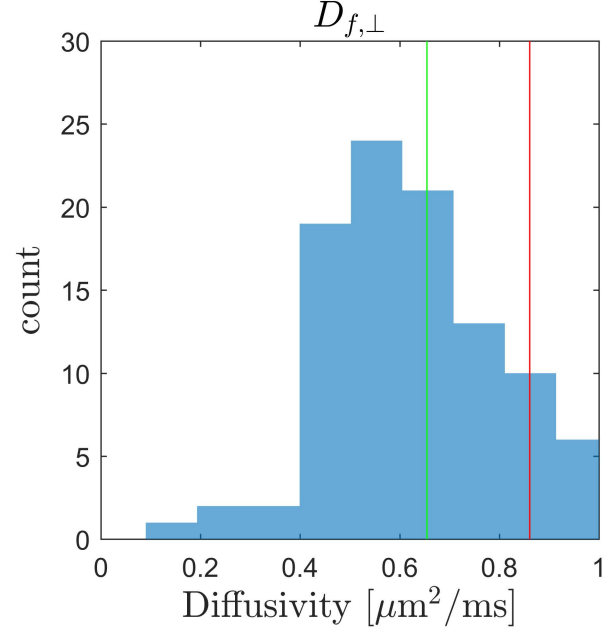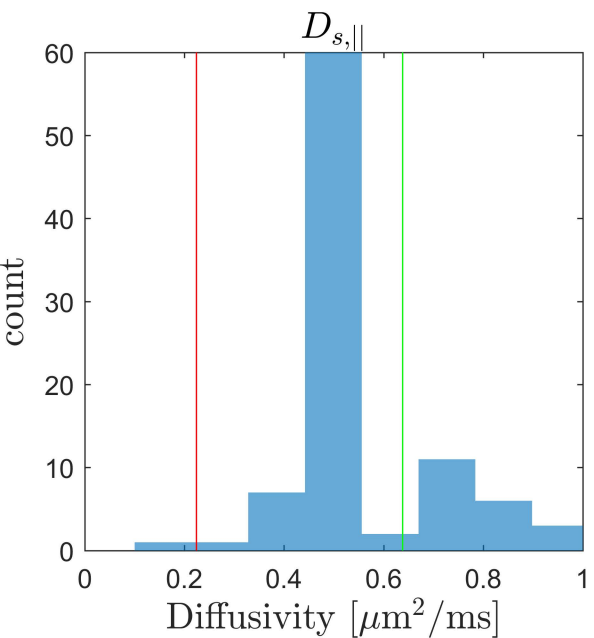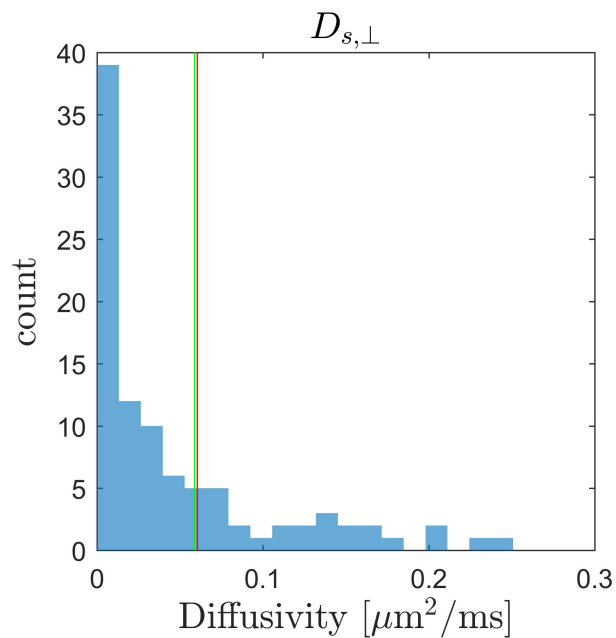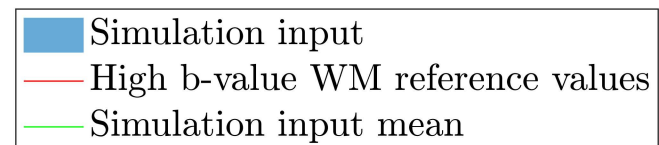

## Branch 1

AWF

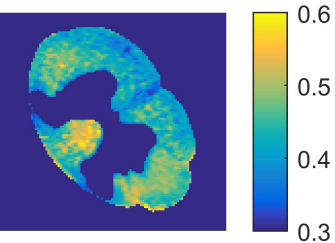

$D_a$  [ $\mu\text{m}^2/\text{ms}$ ]

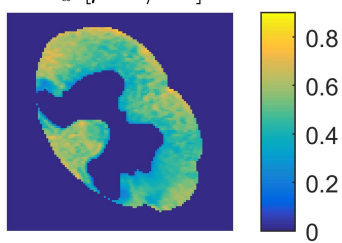

$D_{e,\parallel}$  [ $\mu\text{m}^2/\text{ms}$ ]

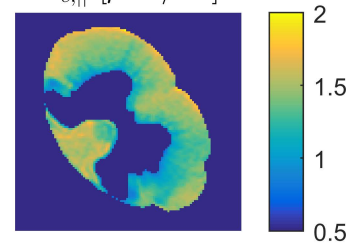

$D_{e,\perp}$  [ $\mu\text{m}^2/\text{ms}$ ]

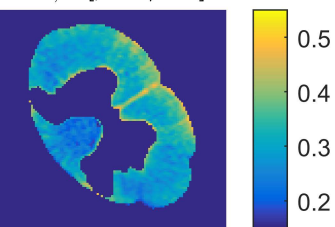

$\alpha$

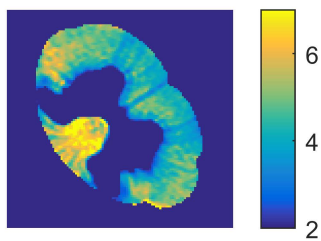

## Branch 2

$D_a$  [ $\mu\text{m}^2/\text{ms}$ ]

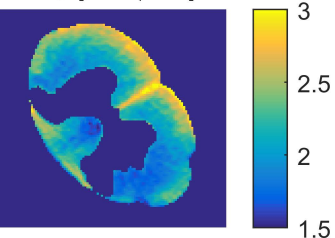

$D_{e,\parallel}$  [ $\mu\text{m}^2/\text{ms}$ ]

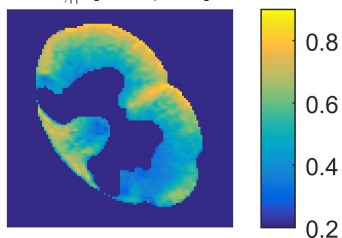

$\alpha$

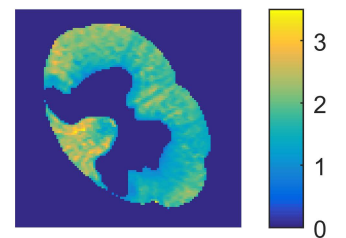

## Branch 1

AWF

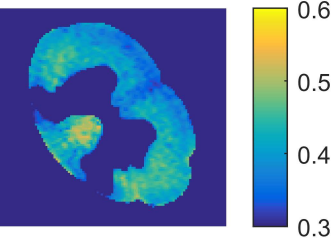

$D_a$  [ $\mu\text{m}^2/\text{ms}$ ]

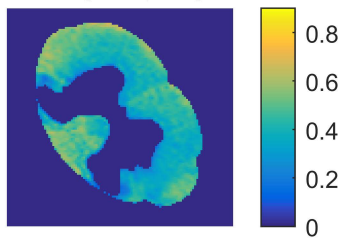

$D_{e,\parallel}$  [ $\mu\text{m}^2/\text{ms}$ ]

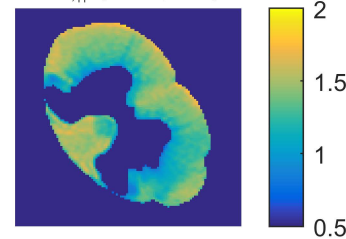

$D_{e,\perp}$  [ $\mu\text{m}^2/\text{ms}$ ]

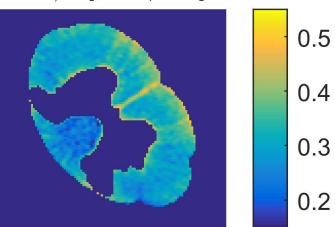

$\alpha$

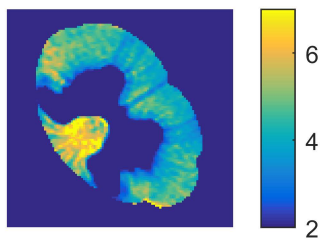

## Branch 2

$D_a$  [ $\mu\text{m}^2/\text{ms}$ ]

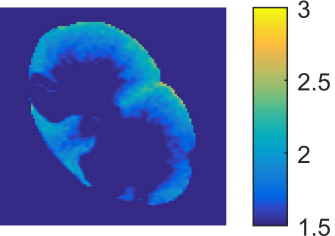

$D_{e,\parallel}$  [ $\mu\text{m}^2/\text{ms}$ ]

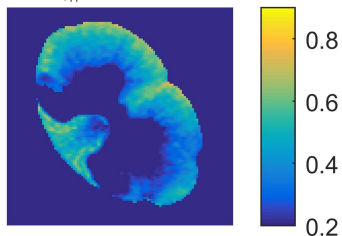

$\alpha$

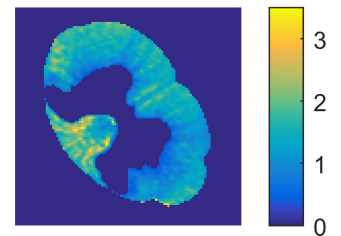

## Branch 1

AWF

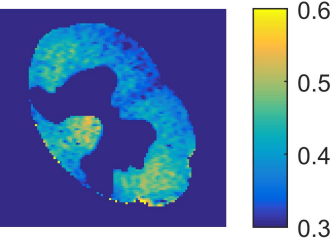

$D_a$  [ $\mu\text{m}^2/\text{ms}$ ]

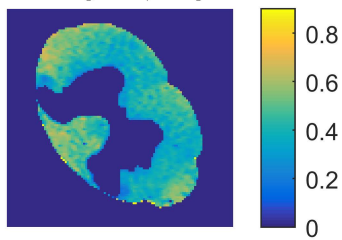

$D_{e,\parallel}$  [ $\mu\text{m}^2/\text{ms}$ ]

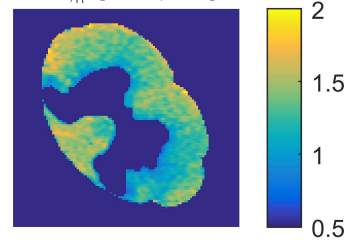

$D_{e,\perp}$  [ $\mu\text{m}^2/\text{ms}$ ]

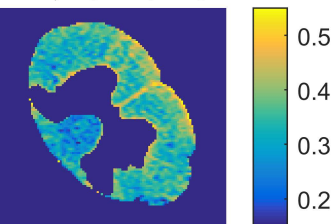

$\alpha$

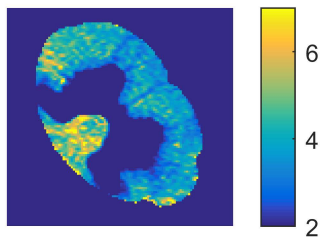

## Branch 2

$D_a$  [ $\mu\text{m}^2/\text{ms}$ ]

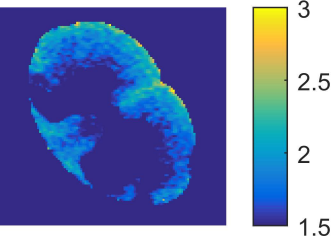

$D_{e,\parallel}$  [ $\mu\text{m}^2/\text{ms}$ ]

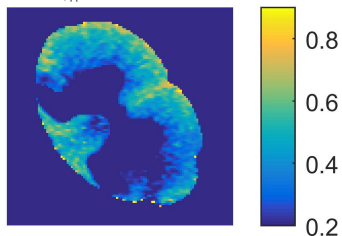

$\alpha$

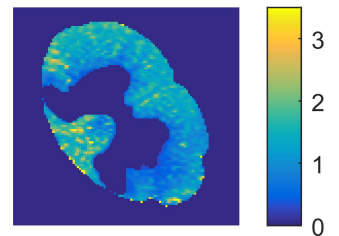

Supplement: NIHMS883543-supplement-Supp_FigS1-4.pdf [file NIHMS883543-supplement-Supp_FigS1-4.pdf]
